# Supplementary material for: Cosmogenic 10 Be in pyroxene: laboratory progress, production rate systematics, and application of the 10 Be- 3 He nuclide pair in the Antarctic Dry Valleys
Source: Copernicus journal article supplement (doi:10.5194/egusphere-2022-1379), 2022-12-21
Supplement: Supplementary file 1 [file egusphere-2022-1379-supplement.zip]

Archive with 6 entries (6 files):
- Balter-Kennedy 2022 - GChron - Supplemental Information.pdf
- Table S1 - Beryllium data.xlsx
- Table S2 - Blanks.xlsx
- Table S3 - SULA_LABCO OES Data.xlsx
- Table S4 - CRPG LABCO Pyroxenes lava composition SARM.xls
- Table S5 - CRPGWR_XRF.xlsx
