# Supplementary material for: Cosmogenic 10 Be in pyroxene: laboratory progress, production rate systematics, and application of the 10 Be- 3 He nuclide pair in the Antarctic Dry Valleys
Source: Copernicus journal article supplement (doi:10.5194/egusphere-2022-1379), 2022-12-21
Supplement: Supplementary file 1 [file egusphere-2022-1379-supplement.zip › Table S2 - Blanks.xlsx]

## Sheet: Sheet1
Blank No.	Sample ID	Carrier concentration (ppm)	Carrier weight (g)	9Be added (mg)	Measured 10Be/9Be	10Be/9Be 1σ uncertainty	10Be (atoms)	10Be uncertainty (atoms)
1	BLK1-2019Aug07	1029.3	0.1825	0.187847	4.21515e-16	1.3338e-16	5292.63	1676.63
2	BLK2-2019Aug07	1029.3	0.182	0.187333	5.1756e-16	1.5618e-16	6480.78	1958.07
3	BLK3-2019Aug07	1029.3	0.1824	0.187744	3.9786e-16	1.4079e-16	4992.87	1768.41
4	BLK1-2020Nov02	1031.9	0.1799	0.185646	3.26725e-16	8.72406e-17	4052.93	1083.9
5	BLK2-2020Nov02	1031.9	0.0762	0.0786339	5.61077e-16	2.12114e-16	2948.04	1115.38
6	BLK-2022Mar24	1038	0.1815	0.188397	8.2479e-16	1.4364e-16	10386.5	1815.55
