# Supplementary material for: Cosmogenic 10 Be in pyroxene: laboratory progress, production rate systematics, and application of the 10 Be- 3 He nuclide pair in the Antarctic Dry Valleys
Source: Copernicus journal article supplement (doi:10.5194/egusphere-2022-1379), 2022-12-21
Supplement: Supplementary file 1 [file egusphere-2022-1379-supplement.zip › Table S4 - CRPG LABCO Pyroxenes lava composition SARM.xls]

## Sheet: Major Trace measurement
			ICP-MS iCapQ et ICP-OES iCap6500 (Sc uniquement)	As	Ba	Be	Bi	Cd	Co	Cr	Cs	Cu	Ga	Ge	Hf	In	Mo	Nb	Ni	Pb	Rb	Sb	Sc	Sn	Sr	Ta	Th	U	V	W	Y	Zn	Zr	La	Ce	Pr	Nd	Sm	Eu	Gd	Tb	Dy	Ho	Er	Tm	Yb	Lu		ICP-OES iCap6500
		Incertitudes (%) en fonction de la teneur	>100µg/g																				<5%																										>10 %
			>50 µg/g	<5%	<5%	<5%		<10%	<5%			<8%		<5%		<5%	<5%	<5%		<10%	<5%		<10%	<5%	<5%	<5%	<5%	<5%	<5%	<5%	<5%	<10%	<5%		<5%	<5%	<5%				<5%		<5%		<5%	<5%			>5 %
			>10 µg/g	<15%	<15%	<15%	<5%	<15%	<10%	<5%	<5%	<20%	<5%		<5%		<15%		<5%		<15%	<5%		<15%	<10%			<10%	<10%	<10%		<20%	<15%	<5%	<10%	<10%	<15%	<5%		<5%	<10%	<5%				<10%	<5%		>1 %
			>1 µg/g	<20%	**		<10%		<20%	<10%	<15%	**	<10%	<10%	<10%	<15%	<20%	<10%	**	<20%	<20%	<10%	<15%	<20%	<20%	<10%	<10%	<15%	<15%	<20%	<15%	**	**	<15%	<15%			<15%	<5%	<10%	<15%	<10%	<10%	<5%	<10%	<15%	<10%		>0.5 %
			>0.5 µg/g																				**																										>0.1 %
			>0.1 µg/g	**		<20%	<20%	<20%	**	**	<20%		<20%	<20%	<15%	<20%	**	<20%		**	**	<20%		**	**	<20%	<20%	<20%	**	**	<20%			<20%	<20%	<20%	<20%	<20%	<10%	<20%	<20%	<15%	<20%	<10%	<20%	<20%	<20%		>0.05 %
			>0.01 µg/g			**	**	**			**		**	**	**	**		**				**				**	**	**			**			**	**	**	**	**	**	**	**	**	**	**	**	**	**		>0.01 %
		Limites de détermination	L.D. µg/g	0.50	5.5	0.05	0.045	0.02	0.08	0.50	0.02	2.0	0.02	0.04	0.03	0.03	0.50	0.015	2.0	0.45	0.15	0.06	0.6	0.30	0.70	0.004	0.015	0.01	0.85	0.80	0.02	7.0	1.50	0.02	0.03	0.004	0.016	0.005	0.002	0.005	0.001	0.004	0.001	0.002	0.001	0.002	0.001		L.D. %
		** L'incertitude sur la mesure est calculée pour 200mg d'échantillon préparé. Elle devient importante (>25%) sur une plage de concentration située entre la limite de détermination et la plus faible concentration pour laquelle un pourcentage d'erreur est indiqué.
No CRPG	Demandeur	Ref Echantillon	Rmq Bulletin	As	Ba	Be	Bi	Cd	Co	Cr	Cs	Cu	Ga	Ge	Hf	In	Mo	Nb	Ni	Pb	Rb	Sb	Sc	Sn	Sr	Ta	Th	U	V	W	Y	Zn	Zr	La	Ce	Pr	Nd	Sm	Eu	Gd	Tb	Dy	Ho	Er	Tm	Yb	Lu
				µg/g	µg/g	µg/g	µg/g	µg/g	µg/g	µg/g	µg/g	µg/g	µg/g	µg/g	µg/g	µg/g	µg/g	µg/g	µg/g	µg/g	µg/g	µg/g	µg/g	µg/g	µg/g	µg/g	µg/g	µg/g	µg/g	µg/g	µg/g	µg/g	µg/g	µg/g	µg/g	µg/g	µg/g	µg/g	µg/g	µg/g	µg/g	µg/g	µg/g	µg/g	µg/g	µg/g	µg/g
2006380	BLARD	BGC 0_2_Px	Grey green clinopyroxene Augite	< L.D.	13.6102	0.3068	< L.D.	0.132	79.7811	427.109	0.4228	5.0428	3.2847	2.225	0.8327	0.0821	< L.D.	0.7042	166.273	4.3264	1.8296	0.1814	100.5	2.5754	8.3052	0.1038	0.4942	0.1406	493.166	53.2283	24.8223	116.726	28.2653	3.4031	10.6891	1.6836	8.3017	2.7125	0.2912	3.0834	0.5987	4.2966	0.9641	2.7709	0.439	2.8909	0.4507
2006384	BLARD	BGC 20_21_Px	Grey green clinopyroxene Augite	0.5662	8.3151	0.1953	< L.D.	0.1141	79.548	396.419	0.163	5.6385	3.3105	2.1132	0.8606	0.0875	< L.D.	0.7668	171.904	0.9087	1.5541	0.1218	100.7	1.3134	7.2197	0.1045	0.5282	0.1497	483.326	58.5504	26.1516	114.013	31.5812	3.6653	11.5056	1.8228	8.8133	2.7834	0.2789	3.2746	0.6259	4.4957	1.0114	2.9093	0.4569	3.0036	0.4697
2006385	BLARD	BGC 30_31_Px	Grey green clinopyroxene Augite	0.6332	11.7301	0.2717	< L.D.	0.1172	78.207	395.657	0.226	5.7367	3.5144	2.127	1.0279	0.0824	< L.D.	1.1616	169.174	1.336	2.04	0.1312	99.89	0.9468	9.2895	0.1169	0.6816	0.1909	469.802	20.3374	25.9988	113.565	35.4566	3.9187	12.1298	1.8982	9.1718	2.8976	0.2809	3.3152	0.6309	4.5248	1.0261	2.9432	0.4631	3.0185	0.4747
																																																	Mean
2006381	BLARD	CRPG 3_5_Px	Black green clinopyroxene Augite	< L.D.	16.341	0.3174	< L.D.	0.1703	71.557	541.402	0.7269	29.908	5.4499	2.2313	1.1878	0.0903	< L.D.	0.9827	221.334	2.5034	6.0692	0.211	102	0.9965	24.8014	0.0889	1.0898	0.2802	500.183	< L.D.	25.0892	93.6608	37.5743	5.3129	14.5206	2.1105	9.7919	3.0678	0.3812	3.3251	0.6368	4.424	0.9898	2.7725	0.429	2.7944	0.4225
2006382	BLARD	CRPG 5_7_Px	Black green clinopyroxene Augite	0.8854	18.7793	0.2771	< L.D.	0.1204	69.9248	559.245	0.6049	24.8771	5.4507	2.0529	1.0529	0.085	1.0601	0.6794	236.166	1.898	5.5321	1.1522	101.5	0.6017	25.3593	0.0725	1.0395	0.2666	494.615	< L.D.	24.7045	92.5122	35.9404	4.5459	12.7549	1.9043	9.0688	2.8243	0.3737	3.2382	0.6176	4.3033	0.9767	2.7198	0.4231	2.7558	0.4215
2006383	BLARD	CRPG 10_11_Px	Black green clinopyroxene Augite	< L.D.	24.923	0.353	< L.D.	0.1216	67.9514	595.25	0.5859	42.7115	6.339	1.8972	0.9583	0.078	1.332	1.3072	252.623	1.8931	6.2652	0.4501	87.97	0.6885	34.283	0.1153	0.8594	0.2151	430.122	< L.D.	20.2135	95.039	32.1806	3.9061	10.3425	1.5419	7.3571	2.2548	0.3827	2.5881	0.4964	3.4867	0.8004	2.2902	0.3527	2.3542	0.3685
2006386	BLARD	CRPG 161_165_Px	Black green clinopyroxene Augite	0.5829	27.1232	0.2822	< L.D.	0.0922	69.378	273.341	0.5792	37.5287	7.5989	1.8075	0.948	0.0634	< L.D.	1.5335	149.638	1.6182	6.6596	0.1056	78.45	0.6289	45.3721	0.133	1.0111	0.2672	396.6	< L.D.	17.8631	94.9761	32.3994	3.8059	9.7108	1.3994	6.5822	1.9372	0.3965	2.2584	0.4311	3.0665	0.6975	2.0024	0.315	2.05	0.3215
																																																	Mean
2006387	BLARD	CRPG 1_2 Bulk	Bulk dolerite	0.5884	116.098	0.5123	< L.D.	0.0822	43.5923	156.88	0.7343	57.1988	14.9421	1.3343	1.2893	0.0439	< L.D.	1.3662	89.4623	3.4998	18.841	0.0703	42.73	0.5786	116.494	0.1277	1.6829	0.4151	211.738	< L.D.	14.4007	70.8436	47.7384	6.2456	13.3648	1.6966	7.0961	1.7965	0.6763	1.9464	0.3519	2.4041	0.5441	1.5264	0.2411	1.5831	0.2452
2006388	BLARD	CRPG 33_34 Bulk	Bulk dolerite	< L.D.	123.163	0.4912	< L.D.	0.0835	45.4641	150.237	0.8753	49.5939	14.244	1.387	1.6779	0.0495	< L.D.	2.0346	86.7277	4.2577	21.8927	0.0865	47.15	1.4942	104.493	0.1882	2.1953	0.557	237.122	< L.D.	16.63	74.4384	60.8397	7.1743	15.6289	1.9739	8.3952	2.1448	0.6497	2.3218	0.4153	2.8635	0.6485	1.8372	0.2841	1.8713	0.2932
2006389	BLARD	CRPG 161_165 Bulk	Bulk dolerite	< L.D.	112.021	0.4303	< L.D.	0.0904	45.6713	157.464	0.7159	40.5744	14.2178	1.4916	1.3765	0.045	< L.D.	2.3542	93.6176	3.057	16.5212	< L.D.	50.18	0.5367	108.481	0.2051	1.7231	0.4271	251.955	< L.D.	15.1302	67.5631	49.146	6.3047	13.8158	1.7642	7.517	1.9617	0.6556	2.1097	0.3813	2.6177	0.5872	1.6453	0.255	1.6496	0.2554
																																																	Mean

																																																	uma (g.mol-1)
[truncated: 23 more columns]

## Sheet: Theoretical PR calculation
Table 2 - Major elements composition (% weight) from electron microprobe measurements on ~10 grains for each sample and predicted SLHL 3Hec production rates
Site	Sample	Phase	Mg	Ti	Mn	Fe	Ca	Al	Na	Si	O	K	Modeled SLHL production ratea 3Hec (at.g-1.yr-1)
Simeto	SI47	Cpx	8.38579	0.989109	0.0941574	5.68803	15.8041	3.06341	0.392169	22.651	42.8382		107.895
Nave	SI41	Cpx	8.31026	0.877045	0.145025	6.53727	15.539	2.52639	0.374228	22.9297	42.6911		107.522
0 - 2 cm depth	BGC 0_2_Px	Grey-green cpx _ Augite	9.81368	0.208643	0.248481	11.0182	10.1633	0.821073	0.115006	24.2368	43.3457	0.0290583	108.289	100
20 - 21 cm depth	BGC 20_21_Px	Grey-green cpx _ Augite	9.46384	0.21344	0.259867	11.5709	9.71799	0.80625	0.115748	24.148	43.6742	0.0298885	108.161	100
30 - 31 cm depth	BGC 30_31_Px	Grey-green cpx _ Augite	9.37035	0.241019	0.256227	11.4239	9.59647	0.923244	0.15433	24.0918	43.8969	0.045663	108.284	100
		Mean	9.54929	0.221034	0.254858	11.3377	9.82593	0.850189	0.128361	24.1589	43.6389	0.0348699	108.245
3 - 5 cm depth	CRPG 3_5_Px	Black green cpx _ Augite	9.0959	0.246415	0.218738	9.73798	11.4443	2.06142	0.253754	24.681	42.1708	0.0896656	107.96	100
5 - 7 cm depth	CRPG 5_7_Px	Black green cpx _ Augite	8.59949	0.208643	0.216569	9.62256	11.2727	2.16623	0.2634	23.9282	43.6334	0.0888353	108.484	100
10 - 11 cm depth	CRPG 10_11_Px	Black green cpx _ Augite	8.25146	0.259005	0.213625	9.66803	10.4064	2.89572	0.347985	23.7879	44.0603	0.109591	108.771	100
161 - 165 cm depth	CRPG 161_165_Px	Black green cpx _ Augite	8.18209	0.262603	0.206577	9.5491	9.35343	3.62839	0.419214	23.6476	44.6381	0.112912	109.409	100
		Mean	8.53223	0.244166	0.213877	9.64442	10.6192	2.68794	0.321088	24.0112	43.6257	0.100251	108.656
1 - 2 cm depth	CRPG 1_2 Bulk	Lava bulk	4.67703	0.142093	0.124086	6.35907	8.73368	8.32455	1.13077	24.0123	46.1153	0.381079	111.113	100
33 - 34 cm depth	CRPG 33_34 Bulk	Lava bulk	4.85557	0.203247	0.13369	6.87885	8.56355	7.68558	1.07512	24.3958	45.7578	0.450819	110.684	100
161 - 165 cm depth	CRPG 161_165 Bulk	Lava bulk	5.05583	0.245216	0.135007	6.49619	9.13184	7.7634	1.03653	24.3069	45.4654	0.363644	110.699	100
		Mean	4.86281	0.196852	0.130928	6.57804	8.80969	7.92451	1.08081	24.2384	45.7795	0.398514	110.832
	Elemental 3He production ratea (at.g-1.yr-1)		116			40	61	107		111	135
a From Masarik and Reedy [1996].
