# Supplementary material for: Cosmogenic 10 Be in pyroxene: laboratory progress, production rate systematics, and application of the 10 Be- 3 He nuclide pair in the Antarctic Dry Valleys
Source: Copernicus journal article supplement (doi:10.5194/egusphere-2022-1379), 2022-12-21
Supplement: Supplementary file 1 [file egusphere-2022-1379-supplement.zip › Table S5 - CRPGWR_XRF.xlsx]

## Sheet: XRF Major Element
XRF MAJOR ELEMENTS
ANALYTE	SiO2	Al2O3	Fe2O3	MgO	CaO	Na2O	K2O	TiO2	P2O5	MnO	Cr2O3	LOI	SUM
METHOD	XRF76C	XRF76C	XRF76C	XRF76C	XRF76C	XRF76C	XRF76C	XRF76C	XRF76C	XRF76C	XRF76C	XRF76C	XRF76C
DETECTION	0.01	0.01	0.01	0.01	0.01	0.01	0.01	0.01	0.01	0.01	0.01	0.01	0.01
UNITS	%	%	%	%	%	%	%	%	%	%	%	%	%
LABCO-3-4-WR	52.5	12.2	11.8	9.86	11.9	1.19	0.45	0.43	0.04	0.2	0.03	0.36	100.9
LABCO-20-21-WR	50.6	17.7	14.3	5.26	11.3	1.76	0.61	0.52	0.05	0.15	0.03	<0.01	100.9
LABCO-55-56-WR	49.9	17.2	14.8	5.24	11.2	1.73	0.6	0.57	0.06	0.16	0.03	<0.01	100.1
LABCO-75-77-WR	51.7	14.6	13.1	7.72	11.5	1.45	0.54	0.49	0.06	0.17	0.03	<0.01	101.1
LABCO-95-97-WR	52.8	14.2	10.6	8.21	12	1.43	0.55	0.48	0.05	0.16	0.02	0.37	100.9
LABCO-116-118-WR	52.2	11.7	11.9	9.56	11.8	1.16	0.48	0.43	0.05	0.2	0.03	0.3	99.8
LABCO-135-137-WR	52.7	13.4	11.1	8.96	12.2	1.33	0.48	0.42	0.04	0.18	0.02	0.55	101.4
LABCO-155-157-WR	51.8	15.9	9.93	7.87	12.5	1.49	0.44	0.37	0.05	0.14	0.02	0.75	101.2

## Sheet: Trace Elemetns
ICP-MS TRACE ELEMENTS
ANALYTE
Li
B
Cr
Co
Sm
METHOD
ICM90A
ICM90A
ICM90A
ICM90A
ICM90A
DETECTION
10
10
10
0.5
0.1
UNITS
ppm
ppm
ppm
ppm
ppm
LABCO-3-4-WR
<10
<10
170
66.4
2.3
LABCO-20-21-WR
<10
<10
190
41.4
2
LABCO-55-56-WR
<10
<10
190
43.1
2
LABCO-75-77-WR
<10
<10
180
53.9
2.3
LABCO-95-97-WR
<10
<10
130
55.5
2.2
LABCO-116-118-WR
<10
<10
180
64.5
2.3
LABCO-135-137-WR
<10
<10
150
59.5
2.2
LABCO-155-157-WR
<10
<10
140
52.4
1.9
