# Supplementary material for: Cosmogenic 10 Be in pyroxene: laboratory progress, production rate systematics, and application of the 10 Be- 3 He nuclide pair in the Antarctic Dry Valleys
Source: Copernicus journal article supplement (doi:10.5194/egusphere-2022-1379), 2022-12-21
Supplement: Supplementary file 1 [file Table S1 - Beryllium data.xlsx]

## Sheet: Sheet1
Sample ID	Pyroxene weight (g)	Carrier weight (g)	9Be added (mg)	Measured 10Be/9Be	10Be/9Be 1σ uncertainty	Blank-corrected [10Be] (atoms g-1)	Blank-corrected [10Be] uncertainty (atoms g-1)	Blank number
SULA surface samples
318	0.0996	0.1795	0.185233	4.07694e-13	7.56655e-15	5.06283e+07	1.20902e+06	B4, B5
439	0.1113	0.1813	0.187091	1.38399e-13	2.57445e-15	1.55136e+07	371532	B4, B5
446S	0.1019	0.1818	0.187607	2.31363e-13	4.30415e-15	2.84279e+07	680220	B4, B5
464	0.1048	0.1819	0.18771	2.29736e-13	4.26994e-15	2.74618e+07	656740	B4, B5
NXP 93*52	0.115	0.182	0.187333	5.93438e-13	1.09942e-14	6.45905e+07	1.54084e+06	B1, B2, B3
444-HF1	0.1537	0.1818	0.188708	1.53705e-13	2.77163e-15	1.25466e+07	296105	B6
444-HF2	0.2228	0.1816	0.188501	1.8745e-13	3.47529e-15	1.05542e+07	252937	B6
444-HF3	0.1971	0.1816	0.188501	1.68203e-13	4.64807e-15	1.06999e+07	338212	B6
444-HF4	0.1949	0.1816	0.188501	1.62119e-13	3.01473e-15	1.04274e+07	250571	B6
444-HF5	0.1571	0.1816	0.188501	1.28057e-13	2.37918e-15	1.02045e+07	245516	B6
Labrynth Core
LABCO-01	0.1486	0.1818	0.187127	6.23919e-14	1.45008e-15	5.2135e+06	145351	B1, B2, B3
LABCO-02	0.15	0.1815	0.186818	5.32126e-14	1.15938e-15	4.39237e+06	117289	B1, B2, B3
LABCO-03	0.151	0.182	0.187333	4.00208e-14	1.12604e-15	3.28175e+06	105947	B1, B2, B3
LABCO-04	0.1472	0.1819	0.18723	3.09906e-14	8.30205e-16	2.59773e+06	81099.6	B1, B2, B3
LABCO-05	0.1246	0.1824	0.187744	1.60295e-14	5.30385e-16	1.56909e+06	58971.7	B1, B2, B3
LABCO-06 (#1)	0.1468	0.1816	0.1874	1.08378e-14	5.08904e-16	900611	45879.9	B4, B5
LABCO-06 (#2)	0.1801	0.1814	0.188293	1.66614e-14	5.472e-16	1.10668e+06	43223	B6
LABCO-07	0.1225	0.1824	0.187744	8.04071e-15	3.88455e-16	778286	42171.3	B1, B2, B3
LABCO-08	0.1412	0.1811	0.186884	6.21946e-15	3.83745e-16	525225	35360.4	B4, B5
LABCO-09	0.1109	0.1814	0.187194	4.11371e-15	3.31001e-16	432411	38623.9	B4, B5
